# Supplementary material
Source: HighWire-hosted journal article supplement (http://qualitysafety.bmj.com/highwire/filestream/161592/field_highwire_adjunct_files/4/bmjqs-2021-014225supp005_data_supplement.pdf)

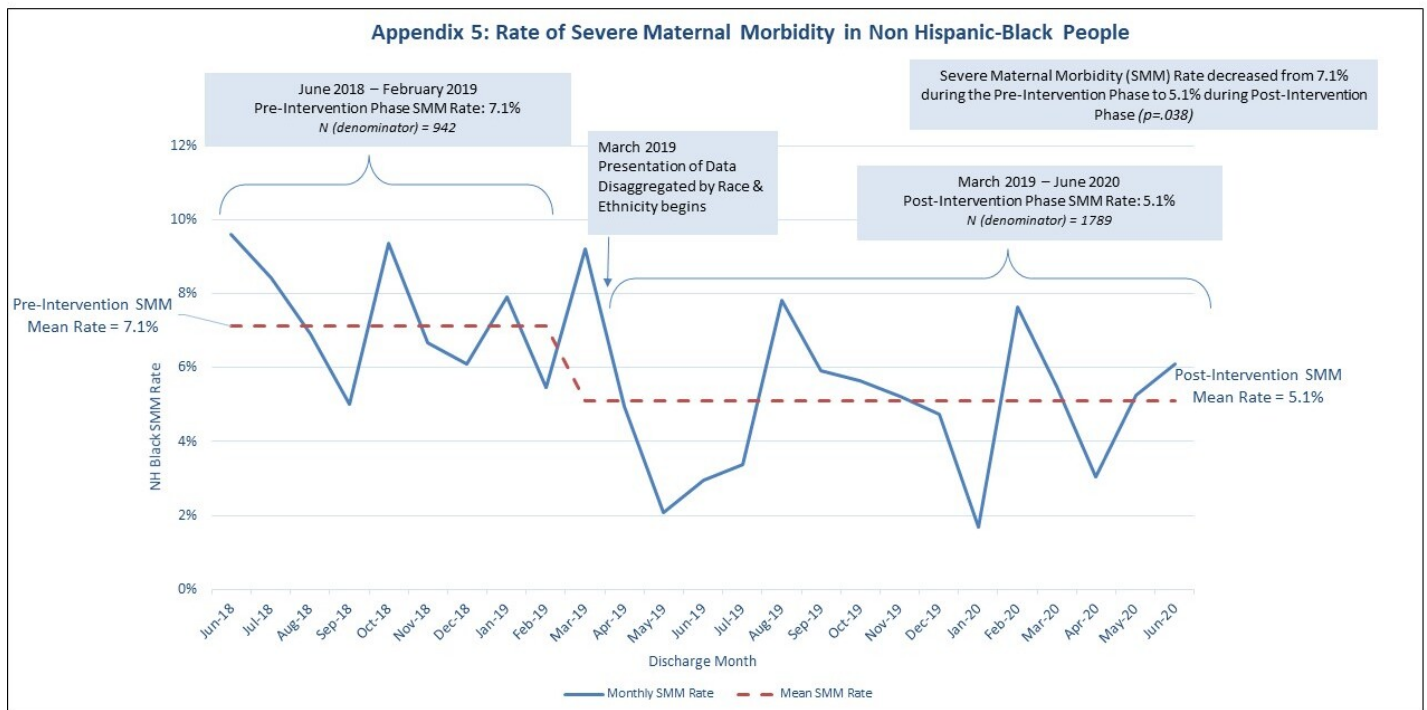

Supplement: bmjqs-2021-014225supp005_data_supplement.pdf [file bmjqs-2021-014225supp005_data_supplement.pdf]
